# Supplementary material for: Hypoxia-challenged MSC-derived exosomes deliver miR-210 to attenuate post-infarction cardiac apoptosis
Source: PubMed Central journal article supplement (PMC7278138; doi:10.1186/s13287-020-01737-0), 2020-06-08
Supplement: 13287_2020_1737_MOESM1_ESM.pdf [file 13287_2020_1737_MOESM1_ESM.pdf]

E

GGGGGAGTGCAGACTTTCTCTATCGATAGGTACCGCCACC GCGAAGAGTGGGAC  
 TTGGATTGGAAAAAGAAACAAGCTTCCAGCTGACTTGCACCCCGGCCGGGTCT  
 GGAGTCCTGCGGGATCCCGTGAACCTTTGTGAGGTGGGGGTA ACTCAGAACCTG  
 TTTCAGGTTGCTGGAGTTCCTGGGACATGGACGCAA ACTCCTCTTGTGGAGTGTG  
 CAGCAGGGCAATGTTATAACTTTTCTCGGCAGACGTCTCTCTCGCAGGCCCAAG  
 AA ACTTGTCTTTGAGTTGGAACCACTGGCTCTAAACTGGCCTAGCACATCATCAT  
 AGGTGGAAGGCATGGTCCCCACCACATCTCCCCTAGGCCCAAGGAATAAACTC  
 CTGAACACCCGGAAAGGGAGGGACCC CAGATCGAAAAGCCAGTCTGTTTGTAGG  
 GTCTCAGTCCCAACAGGTGAGGCCTGAAACCAGGCCGGAAGCAGGTGGGCAGCC  
 CTGAGACATGGGTGAAACCAGGACTTCTGAAAGGGTCCC GGGAAAGGGAGCTAG  
 AGGGGCAGTTAGCAACTGAGTTTTATAGACATGCCCTGGTGACAAGGGGGGCTTT  
 GGGTTCCTCCTCCATTGGAGTTTGCATCAAAGGTCAGGAGCCGGCAGTGGCTGGT  
 CCTTTCCATTCTGCTCTTCCACGGGCTCTTTCCTGGGGTCTGGACAAACCGAATG  
 ATTCCAGCACCAGTTCAGTATAAACTTCAGGGAGAGTTTCTGGTGAACCAGGC  
 CTGCTGTTGGGTAGAAATTCGGACAGATTACTTGTAAACAGGGCAGTTACACCTTT  
 GTCCTGACCCTTCAAAGTCCACATATTCTAGAAGGCCACCTATGGCCACAAGG  
 ACACAATGGCTGTAGTGATCTGTTTACCAGGTAGTCTTGCCTGCCGGTTTGGAGC  
 CTCAGAGTGATCTGGGGACCTCCCAGGGCCTTACTTATCTTCGGATTTATTAGGGT  
 GAGGAGTGGGGGAGACCACACAGATGCCCTAACTGCTGCTTGACCTTAAAGAA  
 ACCTTGGCCCCCAGTCTATCTTCTGTGGGGCGTGACCTCGGCACTGCACAGCCA  
 GCCTGAGGGGTGGGGGA ACTTATGGCTGCTGGGCATGGGGCAGAGGCAGAGCTG  
 TCGGGTTGGGTGGTTCCCTCTTTCCTCAACCCCATCAATCCTGGGCTGGCTGCC  
 CGCTCTTTTCCCACAGAGCTGGGTTTCCCTGGGGACCAGTGGCTTGGCCTAGCCT  
 CACACCCACAGCCCCCTCTGGCCACA ACTCACGCTAGAAGGAGGGCTGGACCCT  
 CCTGGACCCTGGCCCTCCCTGCCCTGCTGACCAAGGTCCAGTAGTCTCTCTCCATT  
 GCTGGGCTGGGAGCAAGGAGCAGTGACTCTCACGGAAGGAGGTAGGTGACTAGA  
 GGTGCTAGTCAGGGTAGTGGCCAAGGCTAGGGTGGGAATCTTGTCACTCTTCTT  
 GTCACTAGGGTGGAAAGAAGAAGGATTCTGGGGACTCTGGTTGTCAGGGTTTGCTA  
 TAGACTTGGTGATCTTACCTAGGGGAATGGAGAGTCCCAGAGTCCCAGACTTGT  
 GGGACTTAGAAAGGGGAGTCTGGGATTAGGTCTCTGCAGTACAGGGTTATGGG  
 CTGTGGCAGACACTAGACTACAGAGGGTCTCAAACAATGCATGCAGTAAGGGGA  
 GTATGAGGTCCCCATGCCAGGAAGCCTCAAAGGGAGACAGATACTATCAAGAGT  
 ACCCTACAAACGCGTTCTGAGCTCCCCATGTAAGACTCTTCTAGGATCCTCCAAG  
 GATGCTTCTGACTCTACCTGCATCTGCATCGGTGCTGCATCTGCATCGGTGCTACG  
 ACCCAATGTCCCATGTCCCCTGCAGGTTCTAAAGCTGTCTAGCTGGCATGGCAGC  
 TCCAGCGTCTCTGAGCGCCACAGGGGGTCCAGTCCTACAGGGCTCATCTAGACC  
 TCGGACAGCTGGACAGCCTGCCATCCGTGCTCCCACCAGCCGGGCTAGATCCAGG  
 CCATTCAACCCTCGAGATCTGCGATCTAAGTAAGCTTGGCATTCCGGTACTGTTG  
 GTAAAGCCACCATGGAAGACGCCAAAAACATAAAGAAAGGCCCGGCCATTCT  
 ATCCG

F

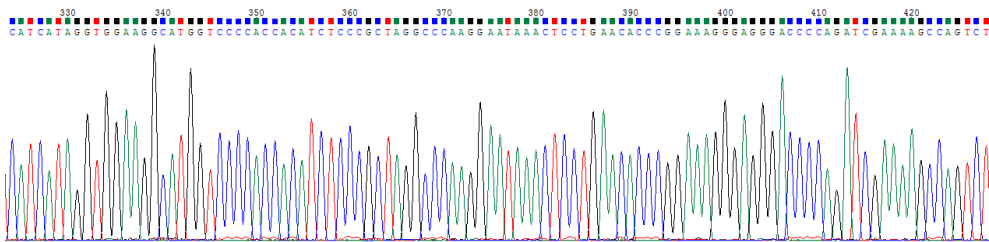

Figure S2.

Successful construction of AIFM3 promoter report vector

(A) PGL3 vector map

(B) Amplification results of gene AIFM3 promoter region

(C) Colony PCR verification results

(D) Verification of overexpression plasmid PGL3-AIFM3 promoter region digestion

(E) Plasmid PGL3-AIFM3 promoter region

(F) Sequencing results
