# Supplementary material for: Hypoxia-challenged MSC-derived exosomes deliver miR-210 to attenuate post-infarction cardiac apoptosis
Source: PubMed Central journal article supplement (PMC7278138; doi:10.1186/s13287-020-01737-0), 2020-06-08
Supplement: 13287_2020_1737_MOESM3_ESM.pdf [file 13287_2020_1737_MOESM3_ESM.pdf]

Table S1. Primer used for PCR

|                       |                                                     |        |
|-----------------------|-----------------------------------------------------|--------|
| AIFM3 promoter region | forward: 5'-CGGGGTACCGCCACCGCGAAGAGTGGGACTTGGATT-3' | 2000bp |
|                       | reverse: 5'-CCGCTCGAGGGTTGAATGGCCTGGATCTAG-3'       |        |
